# Supplementary material
Source: PubMed Central journal article supplement (PMC3003077)
Supplement: 1003619107_pnas.201003619SI.pdf [file 1003619107_pnas.201003619SI.pdf]

# Supporting Information

Humphry et al. 10.1073/pnas.1003619107

A

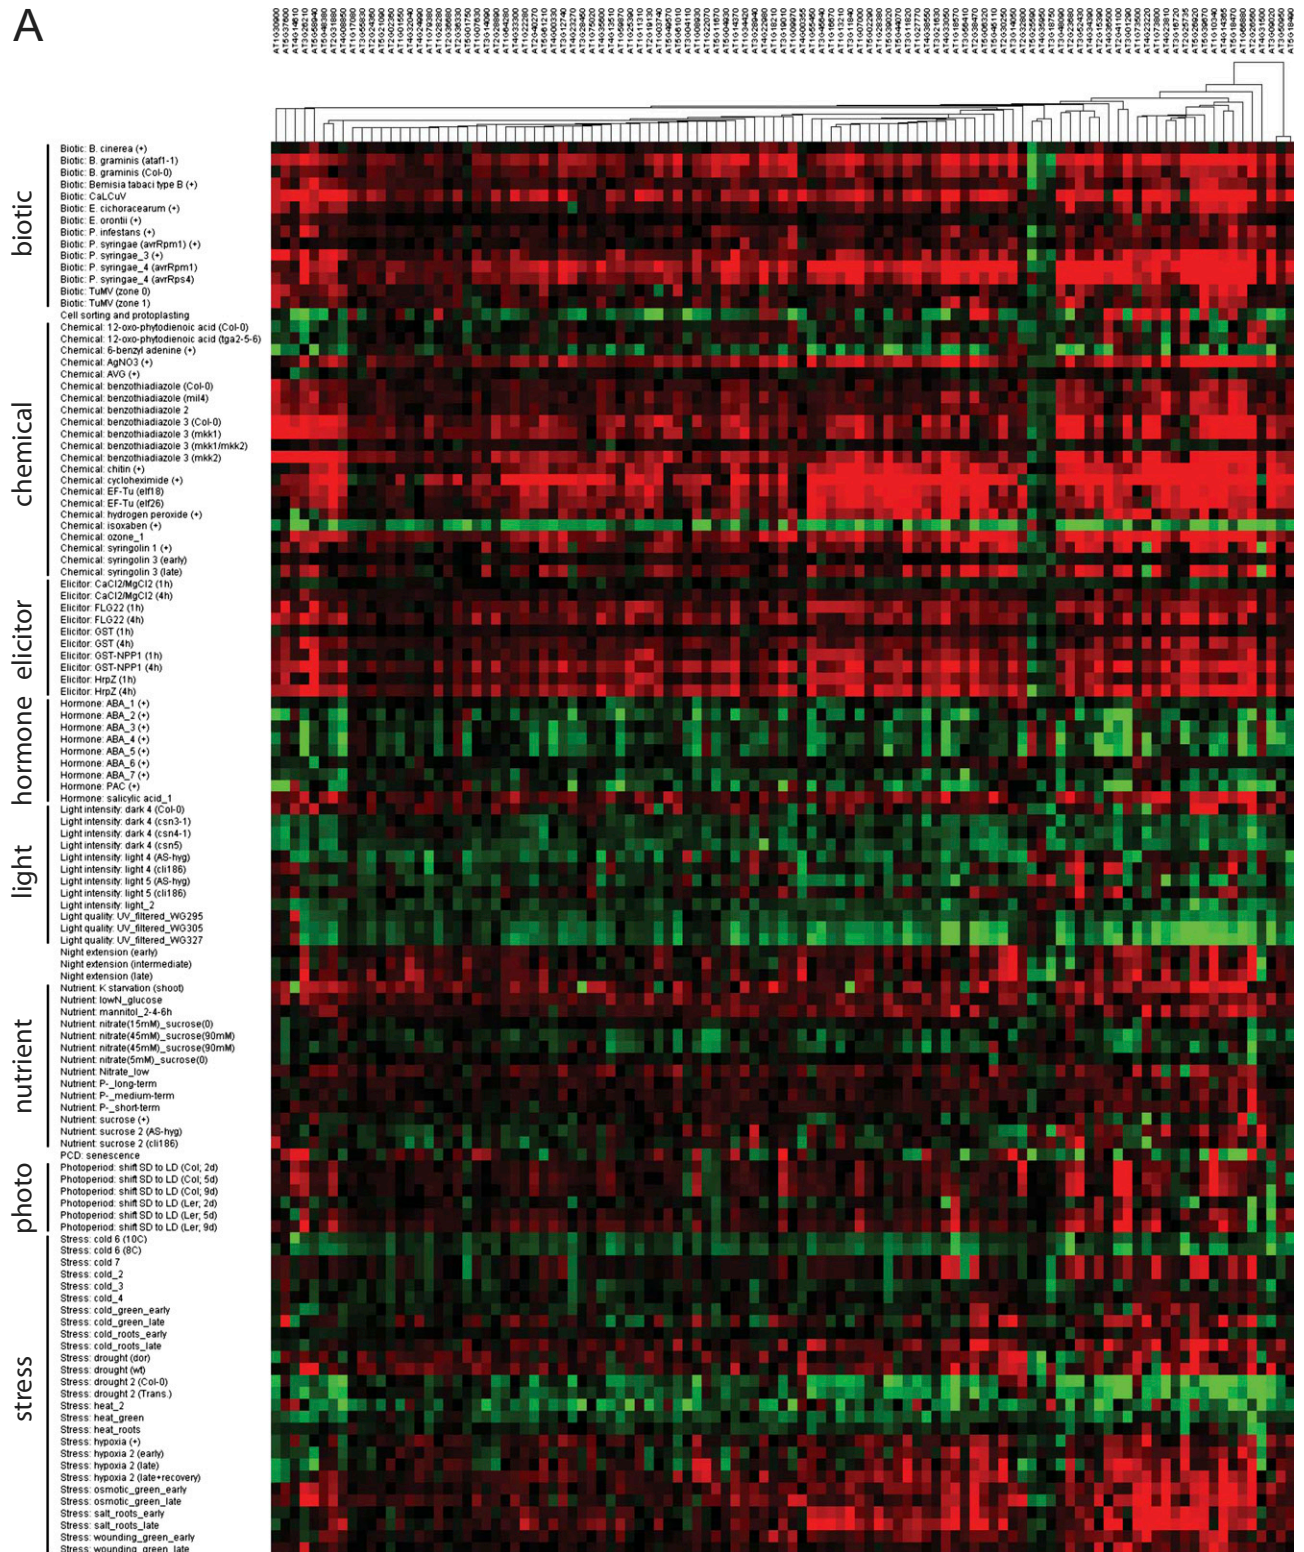

Fig. S1. (Continued)

B

35S: amiR-white-1(MIR172a)  
35S: amiR-white-2(MIR172a)  
35S: AIRALF1-1  
35S: MBF1c  
aba1-1  
aba1-1.1  
aba1-1.2  
abh1  
abh1.1  
abh1.2  
ANAC059OE  
ANAC092OE  
ang4  
aox1a(sail)  
aox1a(saik)  
ape2  
ape2.1  
ape2.2  
ARR21Cox  
ARR22ox  
ARR22ox.1  
ARR22ox.2  
avr1-12  
Bla-1  
BLS\_TCP4  
BOULTA  
camta1-1  
camta1-2  
camta3-1  
camta3-2  
cov2  
cpr5  
cpr5 npr1  
cpr5 npr1 sv1  
cpr5 scv1  
csn3-1  
csn4-1  
csn5 (csn5a-2 csn5b)  
eds1-1  
elo3  
fls2-17  
fls2-17.1  
fls2-17.2  
flu  
flu.1  
flu.2  
fluOver-TAPX  
Hih-0  
HIC  
hsp90.1  
hsp90.2  
hsp90.2-3  
hsp90.3  
hst15  
Ler-ttg  
Ler-ttg.1  
Ler-ttg.2  
mxd4  
Mir-0  
mkk1/mkk2  
mkk2  
mpk4  
mpk4 ctr1  
nahG  
ox6  
pad4-5  
pho1  
pho3  
pho3.1  
pho3.2  
pmr4-1  
pmr5  
pmr5 pmr6  
pmr6  
pvip1.pvip2  
Se-0  
se-1  
sn1  
sph1.1  
sph1.2  
tga2-5-6  
Umkirch-1/Umkirch-3

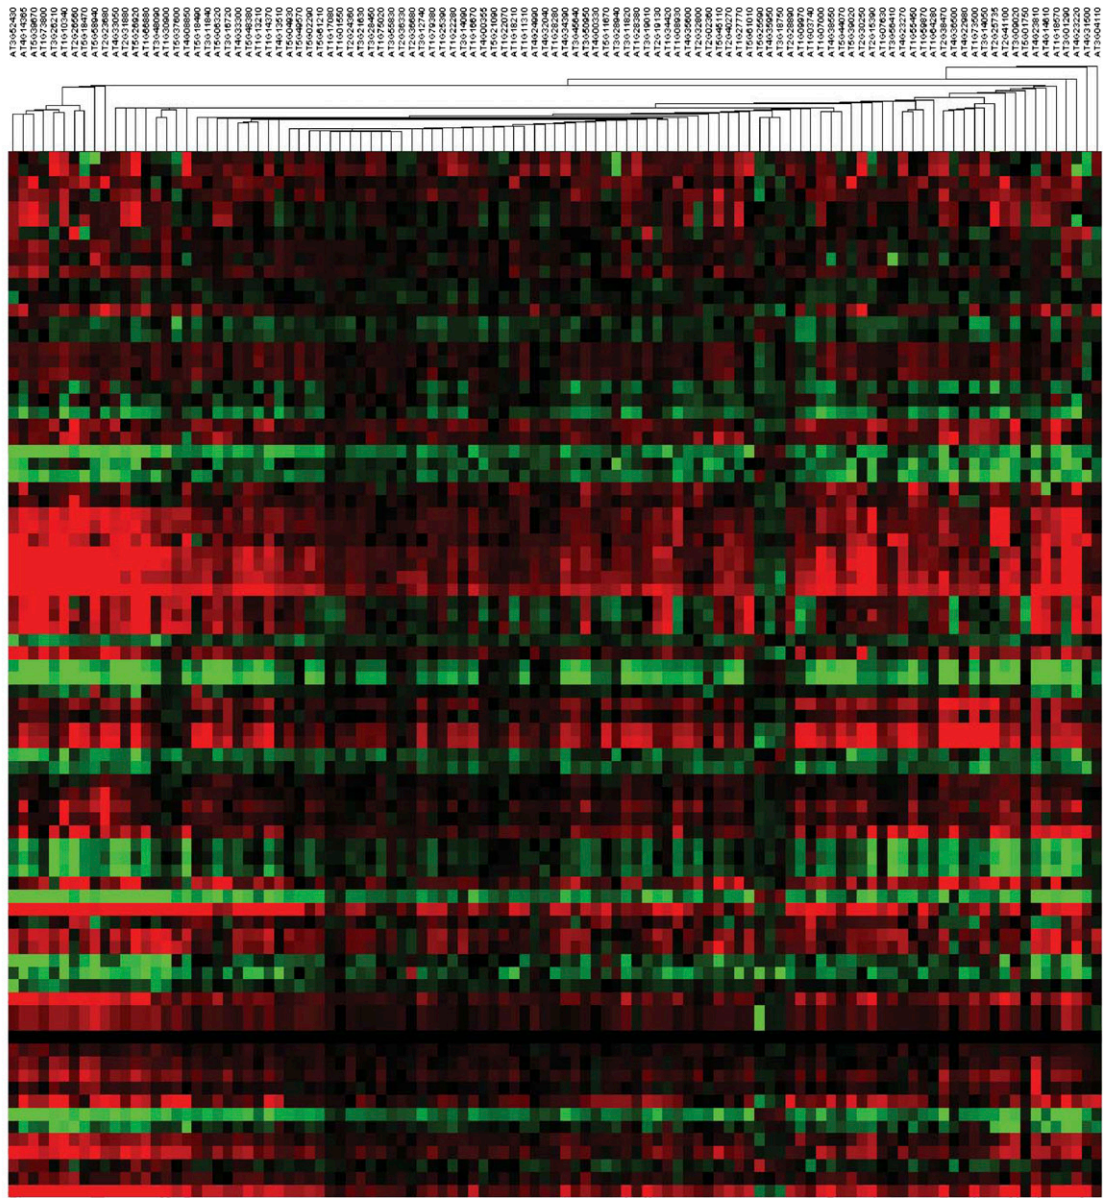

Fig. S1. (Continued)

C

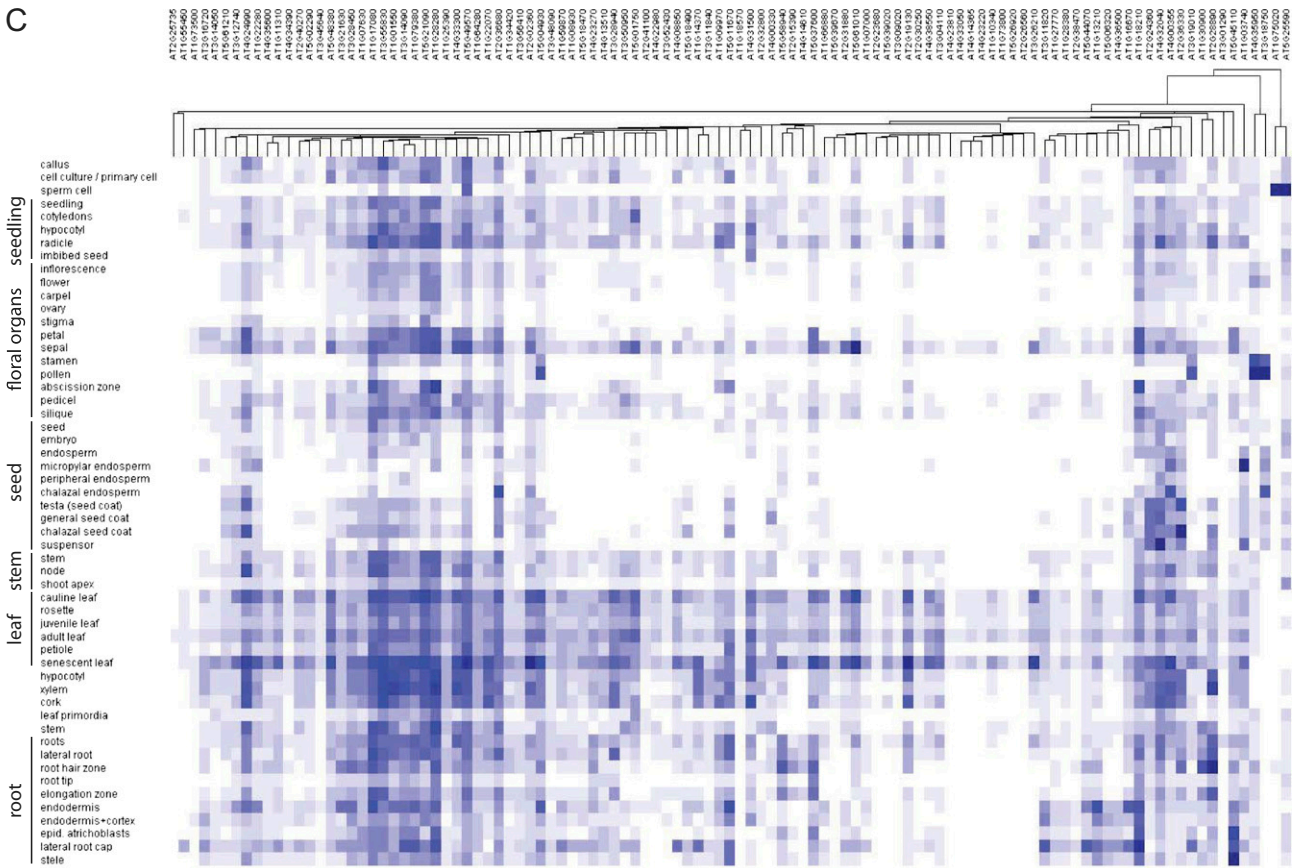

**Fig. S1.** In silico meta analysis of unique coexpressed genes. Expression analysis of genes found to be coexpressed with *MLO2*, *PEN1*, and *SNAP33* was carried out by using the Web-based tool Geneinvestigator V3 on the basis of (A) stimuli, (B) mutations, and (C) plant anatomy. For A and B, relative gene expression is indicated as red or green for up- or down-regulated gene expression, respectively, compared with the relevant control. For C, absolute gene expression values (scaled to the expression potential of each gene) are shown, with the darkest for A and B, respectively, and relative gene expression is indicated by increased darkness of blue color representing the maximum level of expression for a given gene across all measurements (C). Data presented in A and B was trimmed to contain only those conditions that exhibited observable expression changes for the majority of genes examined. Genes were grouped according to their global patterns for each condition via hierarchical clustering.

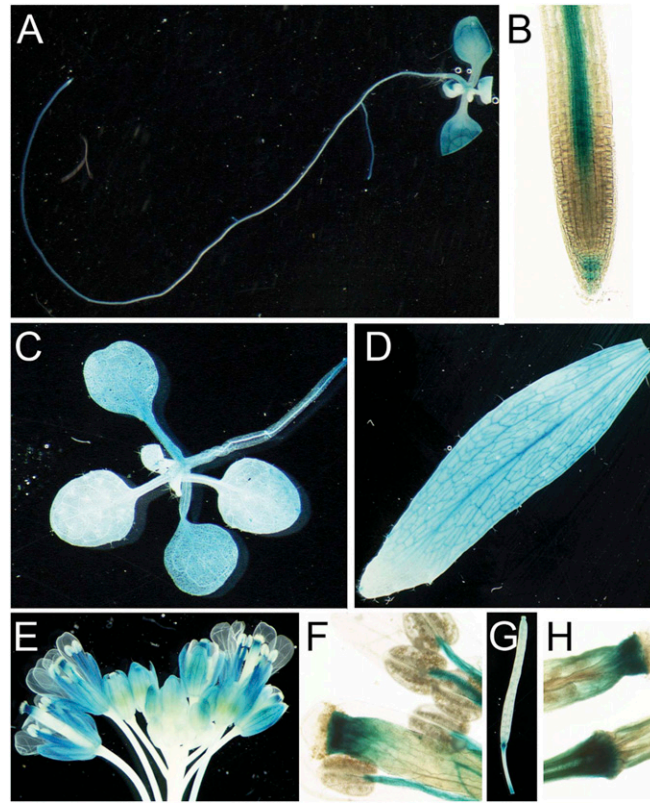

**Fig. S2.** A unique *cis* element in *Arabidopsis* controls gene expression in young seedlings and floral organs. Histochemical analysis of different tissues of transgenic *Arabidopsis* plants expressing a promoter-*GUS* construct containing a tandem repeat of the unique *cis* element (see text). (A) Ten-day-old plate-grown seedlings. (B) Close-up of roots shown in A. (C) Two-week-old soil-grown seedlings. (D) Cauline leaf. (E) Flowers. (F) Close-up of floral organs shown in E. (G) Siliques. (H) Close-up of tip (upper) and abscission zone (lower) of siliques shown in (G). Similar expression patterns were observed in four independent transgenic lines.

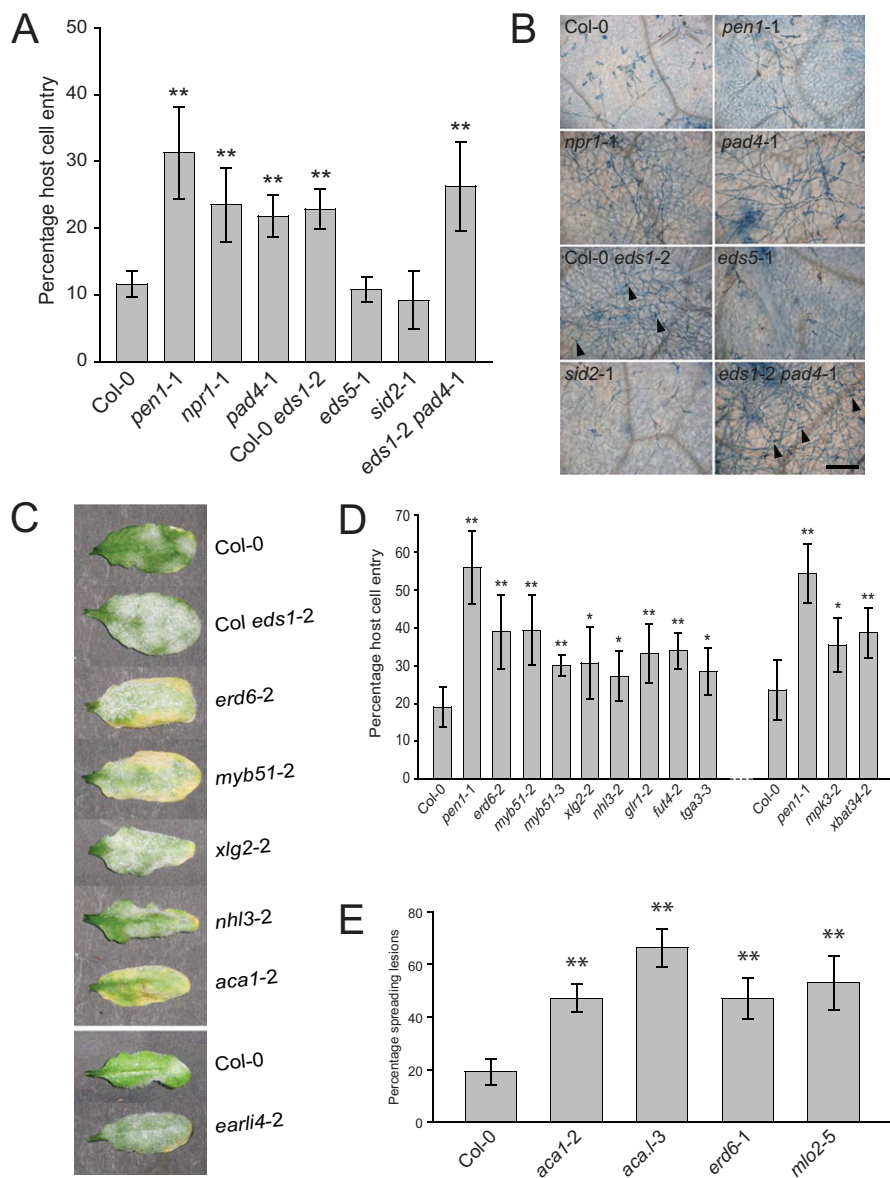

**Fig. S3.** Mutations in coexpressed genes allow enhanced growth of a range of pathogens with differing lifestyles. (A) Quantitative analysis of host cell entry of *E. pisi* on mutants defective in salicylic acid (SA)-based signaling and defense assayed at 3 d after inoculation. Data shown indicate the mean  $\pm$  SD based on at least five independent leaves. (B) Microscopic evaluation of epiphytic *E. pisi* fungal growth (hyphae) on above mutants at 7 d after inoculation. Arrowheads point to asexual reproductive structures (conidiophores). (Scale bar: 100  $\mu$ m.) (C) Representative macroscopic phenotypes of Col-0 and selected insertion lines (second alleles of those shown in Fig. 2) at 10 d after inoculation with *G. orontii*. (D) Quantitative analysis of host cell entry of *E. pisi* on second alleles of selected insertion lines shown in Fig. 2 determined at 3 d after inoculation. Results represent mean  $\pm$  SD of at least five leaves per genotype. (E) Quantification of disease symptoms on second alleles of selected insertion lines shown in Fig. 2 6 d after inoculation with *B. cinerea* (Materials and Methods). Results represent mean  $\pm$  SD of three independent samples per genotype. For all data, asterisks indicate a significant difference from Col-0 (\* $P \leq 0.05$ ; \*\* $P \leq 0.01$ ; Student's *t* test). Comparable results were obtained in at least three (A–D) or two (E) independent experiments.

#### Dataset S1. List of genes coexpressed with known basal defense components

[Dataset S1](#)

#### Dataset S2. Enriched processes identified in coexpressed genes in Arabidopsis and barley

[Dataset S2](#)

Dataset S3. Coexpressed barley genes (Affymetrix Barley1 contigs) and their HarvEST unigene counterparts

[Dataset S3](#)

Dataset S4. Coexpressed barley genes (HarvEST unigenes) and their Arabidopsis counterparts

[Dataset S4](#)

Dataset S5. Overrepresented 6-mer *cis*-acting elements in 5' upstream regions of coexpressed genes

[Dataset S5](#)

Dataset S6. Insertional and EMS mutant lines used in this study and their phenotypes

[Dataset S6](#)

Dataset S7. Microarray experiments used for coexpression analysis

[Dataset S7](#)
